# Supplementary material
Source: PubMed Central journal article supplement (PMC3250124)

**Regard et al.**

**SI Appendix**

**Materials and Methods**

**Mice:** All mouse strains have been reported previously. All experiments were performed in accordance with the NIH IACUC.

**DNA constructs:** Supertopflash was provided by Dr. Randall Moon (University of Washington) and Renilla-luciferase plasmid (phRL-null) was purchased from Promega. pIRES-control and pIRES-Wnt3a have been described(1) and pcDNA-hG $\alpha$ s-WT, pcDNA-hG $\alpha$ s-R201C, pcDNA-hG $\alpha$ s-R201H have been reported(2). Myc-Axin was provided by Dr. Frank Constantini (Columbia Univ.). Constructs for HA-G $\alpha$ s-WT, HA-G $\alpha$ s-QL, HA-G $\alpha$ i2-WT, HA-G $\alpha$ i2-QL, HA-G $\alpha$ q-WT, HA-G $\alpha$ q-QL, HA-G $\alpha$ 13-WT, HA-G $\alpha$ 13-QL,  $\beta$ 2-AR, G $\alpha$ i/13 and Rac1-QL were kindly provided by Dr. J. Silvio Gutkind (NIH/NIDCR). Lentiviral shRNA plasmids against Human  $\beta$ -catenin were purchased from Sigma: LV1 (TRCN0000003843) and LV2 (TRCN0000003845). PcDNA- $\alpha$ 2A-AR was provided by Dr. Brian Kobilka (Stanford University). PcDNA3.1-M1-AchR, -M2-AchR, -G $\alpha$ o-QL and -G $\alpha$ z-QL were purchased from the Missouri S&T cDNA resource. PcDNA-Gs-DREADD and -Gq-DREADD have been reported(3). CRE-luciferase, SRE-Luciferase and Ap1-luciferase were purchased from Stratagene.

**Antibodies:** mouse anti- $\beta$ -catenin (BD Biosciences, 610154), rabbit anti- $\beta$ -catenin (Cell signaling, 9562), mouse anti  $\beta$ -actin(Sigma, A5441), mouse anti-myc (Santa Cruz, sc-40), mouse anti-HA (Santa Cruz, sc-7392), rabbit anti-G $\alpha$ s(4), anti-G $\alpha$ q/11 (Santa Cruz, sc-392), anti-G $\alpha$ 12/13 (Santa Cruz, sc-409 and sc-410), rat anti-tubulin (Abcam, ab6160), phospho-CREB and total CREB (Upstate), phospho-LRP6 (Cell Signaling, 2568)

**Other Reagents:** Lithium chloride, forskolin, 3-isobutyl-1-methylxanthine (IBMX), isoproterenol, carbachol, and clonidine were purchased from Sigma-Aldrich. Clozapine-N-oxide (Enzo Life Sciences) and pertussis toxin (Calbiochem) were also purchased. GFP- and Cre-adenoviral stocks were produced by SAIC (SAIC, Frederick, MD).

**Cell culture:** hBMSCs were isolated as previously described(5). hBMSCs were grown in Alpha-MEM, 20% lot-selected FBS, 100U/mL penicillin, 100 $\mu$ g/mL streptomycin, 2mM glutamine, 10<sup>-8</sup>M dexamethasone, 10<sup>-4</sup>M L-ascorbic acid 2-phosphate. For osteoblast differentiation, hBMSCs were grown to confluence and placed in osteogenic media for 3-4 weeks: DMEM, 10% lot-selected FBS, 100U/mL penicillin, 100 $\mu$ g/mL streptomycin, 2mM glutamine, 10<sup>-8</sup>M dexamethasone, 10<sup>-4</sup>M L-ascorbic acid 2-phosphate and 10mM  $\beta$ -glycerol phosphate. Mouse BMSC were isolated from 8-10 week old mice and cultured using similar media to hBMSCs, though without dexamethasone. MEF cells were isolated from E12.5 embryos and cultured in DMEM containing 20% FBS, 100U/mL penicillin, 100 $\mu$ g/mL streptomycin, 2mM glutamine, 1mM sodium pyruvate, 1X MEM non-essential amino acids (Gibco). Polyclonal MEF cell lines were formed by spontaneously immortalize. 293T cells (ATCC) were grown in DMEM, 10% FBS, 100U/mL penicillin, 100 $\mu$ g/mL streptomycin, 2mM glutamine. Hela cells (ATCC) were grown in DMEM, 10% FBS, 100U/mL penicillin, 100 $\mu$ g/mL streptomycin, 2mM glutamine.

**Immunohistochemistry:** For  $\beta$ -catenin staining on decalcified human bone sections, slides were deparaffinized and boiled in 0.1M citrate buffer for 15 minutes. Endogenous peroxidase activity was quenched by placing slides in 3% $H_2O_2$ /MeOH for 15 minutes. Slides were blocked with 5% goat serum/TBST for 1 hour and rabbit anti- $\beta$ -catenin (Cell Signaling #9562; 1:80)

overnight at 4°C. Slides were washed with TBST and staining was detected using the ABC elite detection kit (Vector).

**Histology:** For H&E staining, mouse tibia were first fixed in 4% paraformaldehyde (PFA) and decalcified with EDTA. For undecalcified sections, mouse tibia were fixed in 4% PFA and embedded in methyl methacrylate. Von Kossa staining was performed using standard protocols. X-gal staining was performed using standard methods.

**Co-immunoprecipitation:** 293T cells were transiently transfected using Lipofectamine plus (Invitrogen). 24 hours following transfection cells were washed with ice-cold PBS and lysed with cold IP buffer [50mM Tris-HCl (pH 7.4), 150mM NaCl, 2mM MgCl<sub>2</sub>, 1% NP-40, 10% glycerol, 10mM NaF, 1mM Na<sub>3</sub>VO<sub>4</sub>, and complete protease inhibitor cocktail (Roche)]. Cells were rotated at 4°C for 20 minutes, scraped into an eppendorf tube, vortexed for 30 seconds and centrifuged for 30 minutes at 4°C. Supernatant was collected, antibody was added for 2 hours at 4°C followed by protein G sepharose (GE Healthcare) for an additional 30 minutes.

**Cytoplasmic  $\beta$ -catenin:** MEF cells were cultured in 6 well dishes in 0.2%FBS media overnight and then treated with 25% Wnt3a-conditioned media/75% 0.2% FBS media for 1-2 hours. Cells were washed in ice-cold PBS, 1mL hypotonic lysis buffer (25mM Tris-HCl pH7.5, 1mM EDTA, 25mM NaF, 1mM DTT, protease inhibitors) was added per well and scraped into an eppendorf tube. Tubes were vortexed and rocked at 4°C for 15 minutes then centrifuged at 3000 RPM for 5 minutes to remove nuclei and unlysed cells. Supernatant was then centrifuged at 100,000XG at 4°C for 90 minutes. This second supernatant fraction was considered the cytoplasmic fraction.

**Immunofluorescence:** Hela cells were transiently transfected using Fugene 6 (Roche). 40ng myc-Axin and 50ng HA-G $\alpha$  were transfected into wells of a 2- well chamber slide (Nalgene,

LabTek II). Cells were fixed and stained 12-24 hours later. As others have described(6), the relative amount and ratios of plasmids is critical.

**Statistics:** Experiments were performed a minimum of 3 times. Graphed data are shown as  $AVG \pm SD$ . P values were generated from unpaired student's T-test.

## Supplemental Figures and legends:

### **S1-S4: $G\alpha_s$ removal leads to decreased Wnt/ $\beta$ -catenin signaling in skeletal**

**development.** S1) X-gal staining of forelimbs from E16.5 control mice containing a Topgal transgene identifies active Wnt/ $\beta$ -catenin signaling in osteoblastic cells (arrow). S2) X-gal staining of forelimbs from *Prx1-cre; G $\alpha_s$ <sup>fl/-</sup>; Topgal* mutant littermate mice shows decreased Wnt/ $\beta$ -catenin signaling (arrow) in osteoblastic cells. S3) qPCR analysis of Wnt/ $\beta$ -catenin signaling transcription targets in these limbs demonstrates reduced levels of *G $\alpha_s$* , *Axin2*, *Tcf1* and *Lef1* mRNA (n=3-5; \*p<0.05). S4) qPCR data showing reduced expression of endogenous targets of Wnt/ $\beta$ -catenin signaling (*Axin2* and *Tcf1*) following removal of  $G\alpha_s$  during osteoblastic differentiation. BMSCs were isolated from *G $\alpha_s$ <sup>fl/fl</sup>* mice and infected with either a control (GFP-) or Cre-containing adenovirus and grown under osteoblastic conditions for 7 days (n=3; avg $\pm$ SD; p=0.001 and 0.005 for *Axin2* and *Tcf1*, respectively).

### **S5: Treatment of BMSCs with shRNA-containing lentiviruses leads to decreased $\beta$ -**

**catenin protein levels.** Human BMSCs were treated with either a control lentivirus (LV) or LVs targeting  $\beta$ -catenin. LV1 leads to a modest (~20%) decrease in  $\beta$ -catenin protein while treatment with LV2 leads to a more substantial (~80%) decrease.

### **S6: Activation of $G_s$ and $G_q$ has opposite effects on Wnt/ $\beta$ -catenin signaling.**

Either prototypical GPCRs known to have restrictive pathway activation or designer receptors exclusively activated by a designer drug (DREADDs)(7), which activate one G protein pathway, were stimulated with specific agonists. MEF cells were transfected with either a vector expressing a  $G_s$ -coupled GPCR (DREADD- $G_s$  or  $\beta$ 2-adrenergic receptor), a  $G_q$ -coupled

GPCR (DREADD-G<sub>q</sub> or M1-acetylcholine receptor) or a control vector, and stimulation of Wnt/ $\beta$ -catenin signaling was quantified using Supertopflash. Activation of G<sub>s</sub>-coupled GPCRs did not affect basal Wnt/ $\beta$ -catenin signaling but potentiated Wnt3a-induced activation (<sup>1</sup>p=0.004; <sup>2</sup>p=0.006). Activation of G<sub>q</sub>-coupled GPCRs inhibited Wnt3a-induced activation (<sup>3</sup>p=0.001, <sup>4</sup>p=0.02). Clozapine-N-oxide (CNO) and isoproterenol (isopr) were added to a final concentration of 10 $\mu$ M. Carbachol (carb) was added to a final concentration of 100 $\mu$ M. (n=3-5; avg $\pm$ SD)

**S7: Activation of G<sub>i/o</sub> has no effect on Wnt/ $\beta$ -catenin signaling while activation of G<sub>13</sub> inhibits this pathway.** Transfection of MEF cells with either of the two G<sub>i/o</sub>-coupled GPCRs ( $\alpha$ 2A- adrenergic receptor or M2- acetylcholine receptor) fails to affect basal or Wnt3a-induced activation of Supertopflash. As no GPCR receptor has yet been identified as being specific for the G<sub>12/13</sub> pathway we chose instead to use a chimeric G $\alpha_{i/13}$  subunit that allows G<sub>i/o</sub>-coupled GPCRs to activate the G<sub>12/13</sub> pathway(8). Co-transfection of M2-AchR with the G $\alpha_{i/13}$  construct leads to inhibition of Wnt/ $\beta$ -catenin signaling (\*p=0.02). Clonidine (clon) was added to a final concentration of 10 $\mu$ M. Carbachol (carb) was added to a final concentration of 100 $\mu$ M. (n=3-5; avg $\pm$ SD)

**S8: Activated forms of G $\alpha$  proteins reproduce the effect of GPCR stimulation.**

Transfection of activated (QL) forms of the G $\alpha$  proteins does not affect basal or LiCl-induced activation of Wnt/ $\beta$ -catenin signaling in MEF cells, but differentially regulates Wnt3a-induced stimulation similarly to receptor activation. G $\alpha_s$ -QL potentiates (p=0.002), while G $\alpha_q$ -QL

( $p=0.03$ ) and  $G\alpha_{13}$ -QL ( $p=0.04$ ) inhibit, signaling. Addition of either  $10\mu\text{M}$  forskolin or  $0.5\text{mM}$  IBMX has no effect. ( $n=3$ ; avg $\pm$ SD)

**S9: Activation with forskolin leads to CRE-luc activation and phosphorylation of CREB.**

For luciferase assay, MEF cells were transfected and allowed to recover overnight before adding forskolin for 8 hours ( $n=3$ ,  $*p<0.05$ ). MEFs were serum starved overnight and incubated with  $10\mu\text{M}$  forskolin for the indicated times. A western blot confirms induction of phospho-CREB while total levels of CREB remain constant. ( $n=3$ ; avg $\pm$ SD)

**S10:  $G\alpha_q$  and  $G\alpha_{13}$  activate Ap1- and SRE-luciferase.** MEFs were transfected with either SRE-luciferase or Ap1-luciferase and a vector encoding the indicated G proteins. After 24 hours the cells were lysed and luciferase levels were quantified ( $n=3$ ,  $*p<0.05$ ). ( $n=3$ ; avg $\pm$ SD)

**S11: Levels of cytoplasmic  $\beta$ -catenin correlate with  $G\alpha$  protein effects.** Wnt3a-induced accumulation of cytoplasmic  $\beta$ -catenin is similarly affected by the presence of activated  $G\alpha$  proteins with  $G\alpha_s$  potentiating Wnt3a-induced  $\beta$ -catenin accumulation and  $G\alpha_q$  and  $G\alpha_{13}$  inhibiting this response. Experiments were performed in MEF cells.

**S12:  $G\alpha_s$  and  $G\alpha_{13}$  compete for binding to Axin.** Cotransfection of 293T cells with Axin and both  $G\alpha_s$  and  $G\alpha_{13}$  leads to reduced binding relative to binding of Axin to either  $G\alpha_s$  or  $G\alpha_{13}$  alone.

**S13:  $G\alpha_s$  is not required for Wnt/ $\beta$ -catenin signaling.** Accumulation of cytoplasmic  $\beta$ -catenin and phosphorylation of Lrp6 are not affected in MEFs lacking  $G\alpha_s$  protein. Cells were treated with 30ng/mL rWnt3a for 1 hour.

**S14: Removal of  $G\alpha_{q/11}$  and  $G\alpha_{i/o}$  does not affect Wnt/ $\beta$ -catenin signaling.** Experiments in which  $G\alpha_{q/11}$  and  $G\alpha_{i/o}$  signaling were removed either singly or doubly from MEF cells demonstrated normal accumulation of cytoplasmic  $\beta$ -catenin and phosphorylation of Lrp6. Cells were treated with 30ng/mL rWnt3a for 1 hour. These results suggest that  $G\alpha_{q/11}$  and  $G\alpha_{i/o}$  are not required for Wnt/ $\beta$ -catenin signaling in MEFs. Cells were pretreated with 100ng/mL PTX.

**S15: Removal of  $G\alpha_{12/13}$  does not affect Wnt/ $\beta$ -catenin signaling.** Removal of  $G\alpha_{12/13}$  from MEF cells failed to affect accumulation of cytoplasmic  $\beta$ -catenin or phosphorylation of Lrp6 in MEFs. These results suggest that  $G\alpha_{12/13}$  activity is not essential for Wnt/ $\beta$ -catenin signaling.



## Supplemental Table 1: Primer sets used for qPCR

|                 |                                    |                                   |
|-----------------|------------------------------------|-----------------------------------|
| <i>18S</i>      | CGT TGA TTA AGT CCC TGC CCT T      | TCA AGT TCG ACC GTC TTC TCA G     |
| <i>B-ACTIN</i>  | GGC ACG AAG GCT CAT CAT TC         | CCG ACA GGA TGC AGA AGG AG        |
| <i>AXIN2</i>    | TTA TGC TTT GCA CTA CGT CCC TCC A  | CGC AAC ATG GTC AAC CCT CAG AC    |
| <i>TCF1</i>     | CGG GAC AGA GGA CCA TTA CAA CTA GA | CCA CCT GCC TCG GCC TGC CAA AGT   |
| <i>ALK PHOS</i> | GAG ACA CTG AAA TAT GCC CTG G      | CTC ATT GGC CTT CAC CCC ACA CAG   |
| <i>BSP</i>      | AGG CAG AAA ACG GCA ACG GCA        | GTC CCC ACG AGG TTC CCC GTT       |
| <i>OC</i>       | GAG CCC CAG TCC CCT ACC CG         | GAC ACC CTA GAC CGG GCC GT        |
| <i>OPG</i>      | CTG TAC AGC AAA GTG GAA GAC CGT G  | GCA GCT TCA GGA TCT GGT CAC TGG   |
| <i>RANKL</i>    | CAG GCC TTT CAA GGA GCT GTG CA     | AAG GAG GGG TTG GAG ACC TCG ATG C |
|                 |                                    |                                   |
| <i>Tubulin</i>  | CAA CGT CAA GAC GGC CGT GTG        | GAC AGA GGC AAA CTG AGC ACC       |
| <i>B-actin</i>  | CAC AGC TTC TTT GCA GCT CCT T      | CGT CAT CCA TGG CGA ACT G         |
| <i>Gs</i>       | GCA GAA GGA CAA GCA GGT CT         | CCC TCT CCG TTA AAC CCA TT        |
| <i>Axin2</i>    | ATG TGT GGA TAC GCT GGA CTT        | TTC TTG ATG CCA TCT CGT ATG       |
| <i>Tcf1</i>     | ACA TGA AGG AGA TGA GAG CCA        | CTT CTT CTT TCC GTA GTT ATC       |
| <i>Lef1</i>     | TCT CAA GGA CAG CAA AGC TC         | CAC TTG AGG CTT CAT GCA CAT       |

## References

1. Topol L, *et al.* (2003) Wnt-5a inhibits the canonical Wnt pathway by promoting GSK-3-independent beta-catenin degradation. *J Cell Biol* 162(5):899-908.
2. Celi FS, *et al.* (2008) The role of type 1 and type 2 5'-deiodinase in the pathophysiology of the 3,5,3'-triiodothyronine toxicosis of McCune-Albright syndrome. *J Clin Endocrinol Metab* 93(6):2383-2389.
3. Guettier JM, *et al.* (2009) A chemical-genetic approach to study G protein regulation of beta cell function in vivo. *Proc Natl Acad Sci U S A* 106(45):19197-19202.
4. Chen M, *et al.* (2005) Increased glucose tolerance and reduced adiposity in the absence of fasting hypoglycemia in mice with liver-specific Gs alpha deficiency. *J Clin Invest* 115(11):3217-3227.
5. Bianco P, Kuznetsov SA, Riminucci M, & Gehron Robey P (2006) Postnatal skeletal stem cells. *Methods Enzymol* 419:117-148.
6. Bilic J, *et al.* (2007) Wnt induces LRP6 signalosomes and promotes dishevelled-dependent LRP6 phosphorylation. *Science* 316(5831):1619-1622.
7. Armbruster BN, Li X, Pausch MH, Herlitze S, & Roth BL (2007) Evolving the lock to fit the key to create a family of G protein-coupled receptors potently activated by an inert ligand. *Proc Natl Acad Sci U S A* 104(12):5163-5168.
8. Marinissen MJ, Servitja JM, Offermanns S, Simon MI, & Gutkind JS (2003) Thrombin protease-activated receptor-1 signals through Gq- and G13-initiated MAPK cascades regulating c-Jun expression to induce cell transformation. *J Biol Chem* 278(47):46814-46825.

# Regard et. al. Supplemental:

S1)

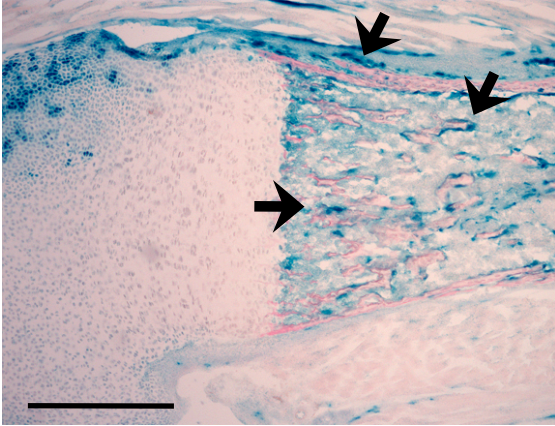

S2)

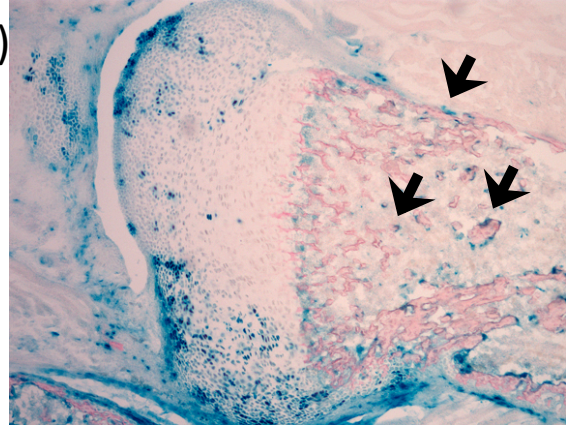

S3)

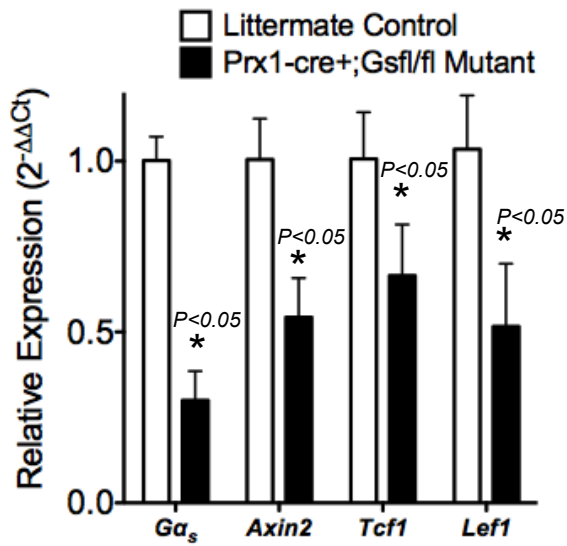

S4)

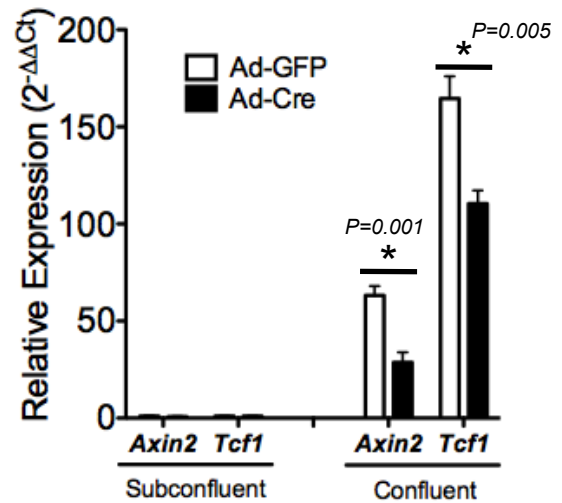

# Regard et. al. Supplemental:

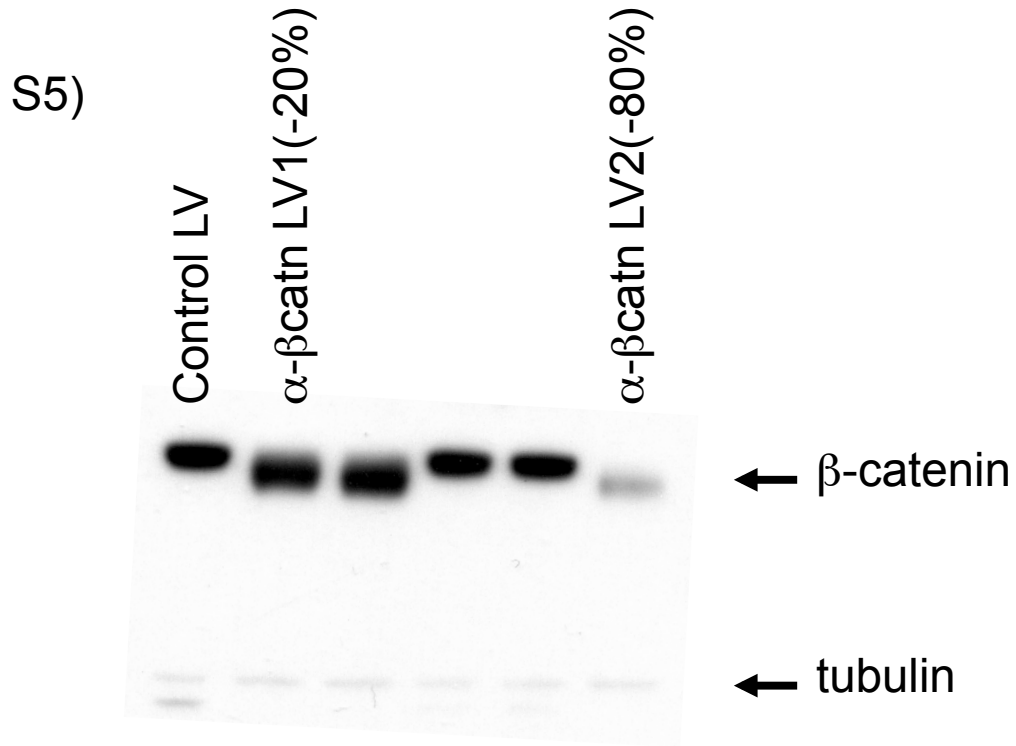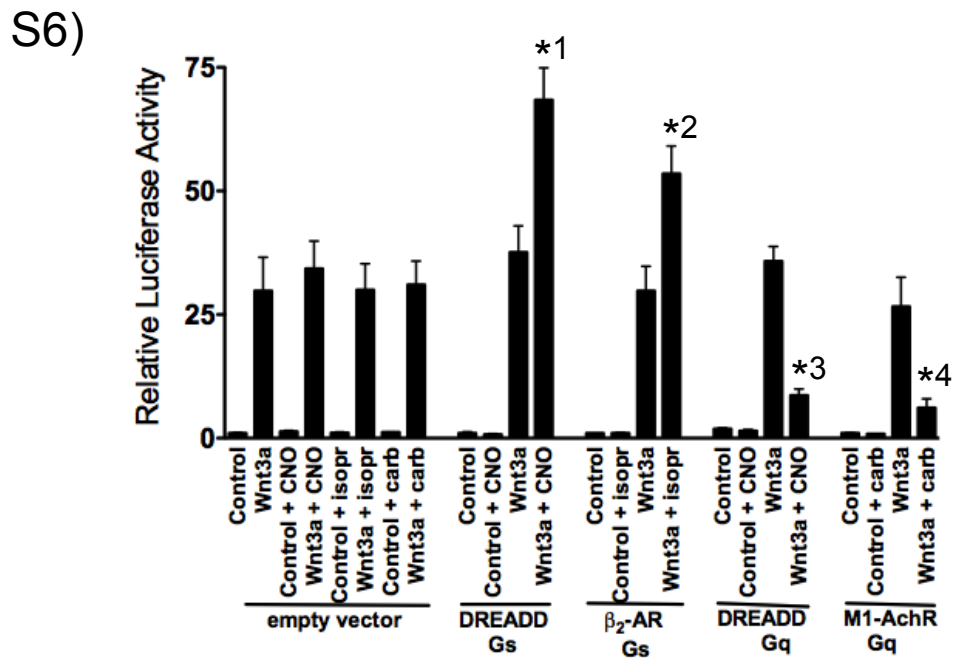

# Regard et. al. Supplemental:

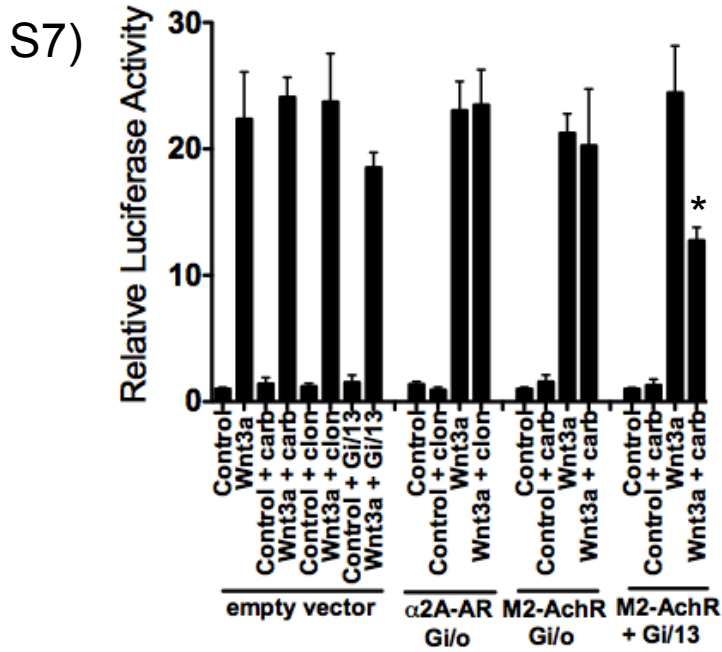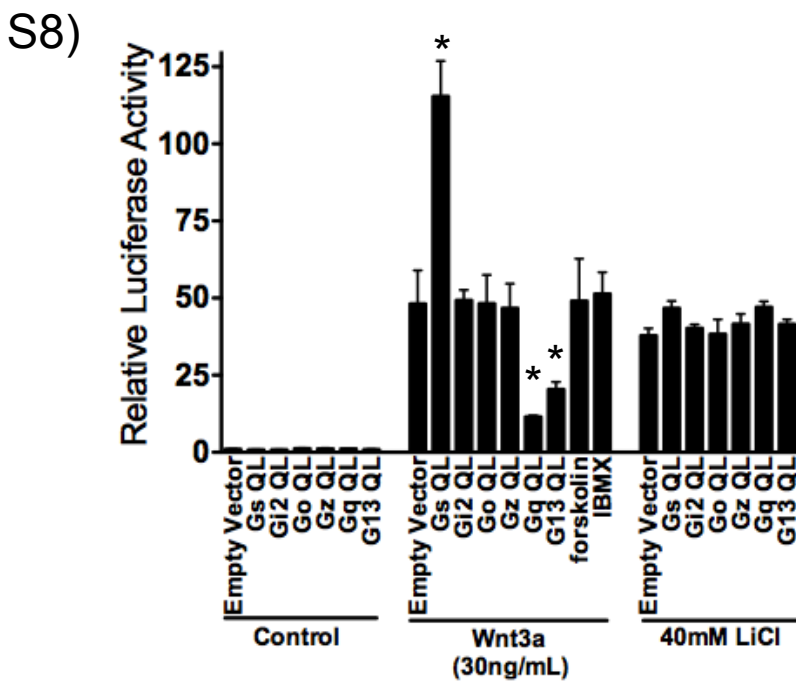

# Regard et. al. Supplemental:

S9)

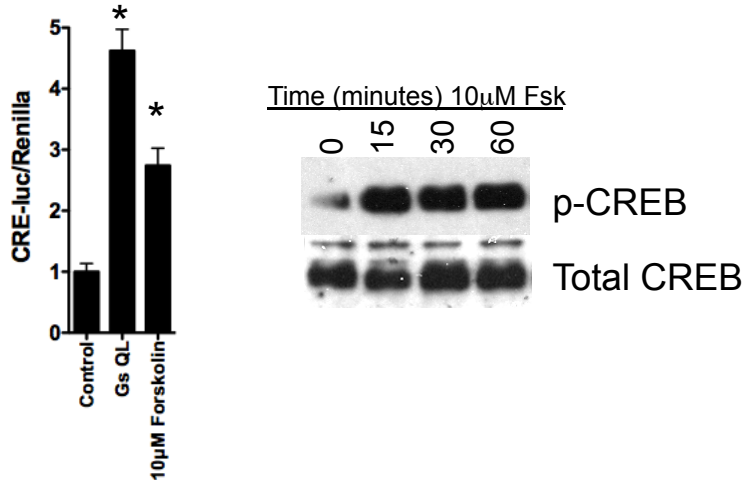

S10)

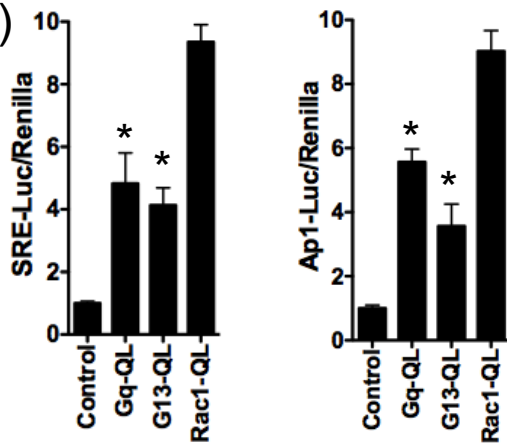

# Regard et. al. Supplemental:

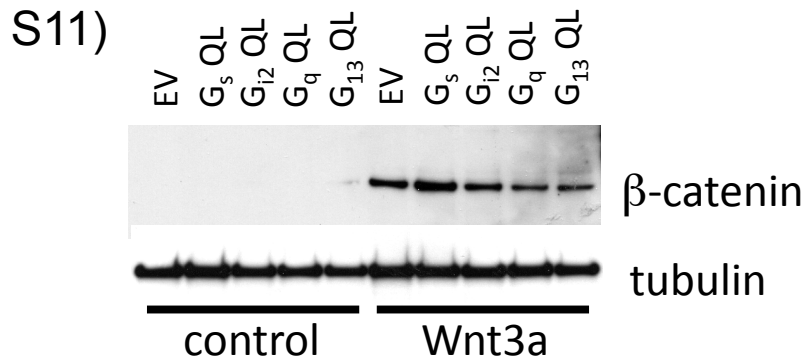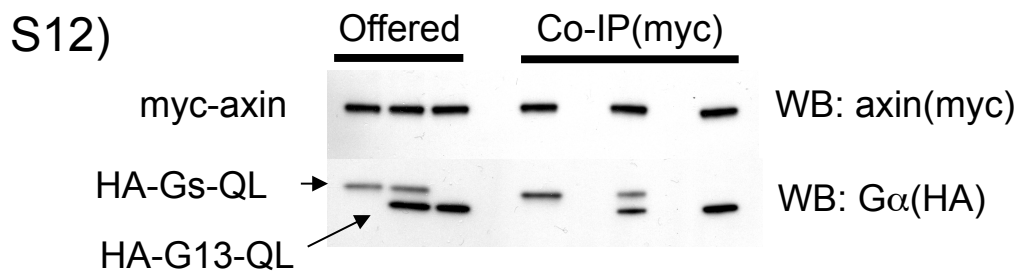

# Regard et. al. Supplemental:

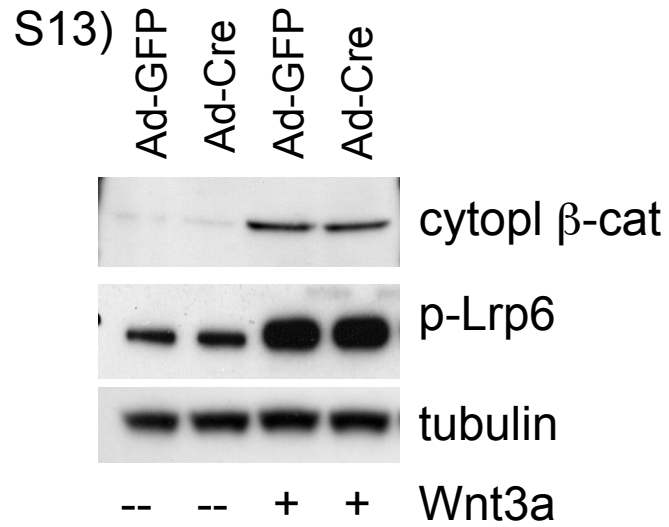





# Regard et. al. Supplemental:

S15)

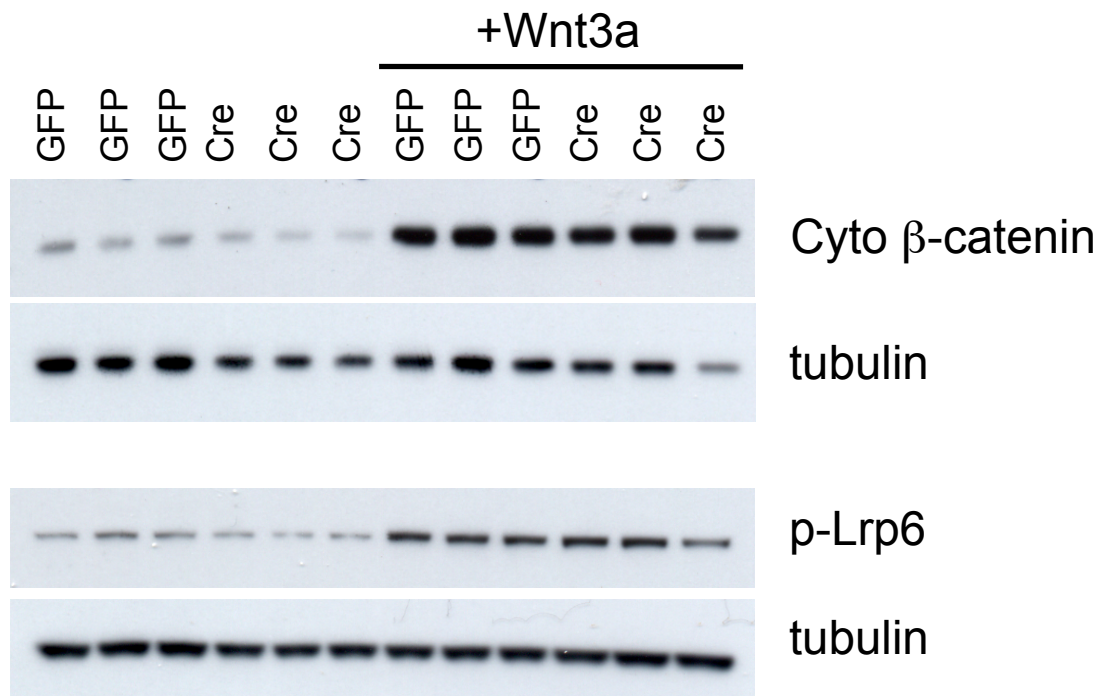

Supplement: 1114656108_sapp.pdf [file 1114656108_sapp.pdf]
